# Supplementary material for: Genome-Wide DNA Methylation Patterns of Muscle and Tail-Fat in DairyMeade Sheep and Mongolian Sheep
Source: MDPI journal article supplement (doi:10.3390/ani12111399), 2022-05-29
Supplement: s1 [file s1]

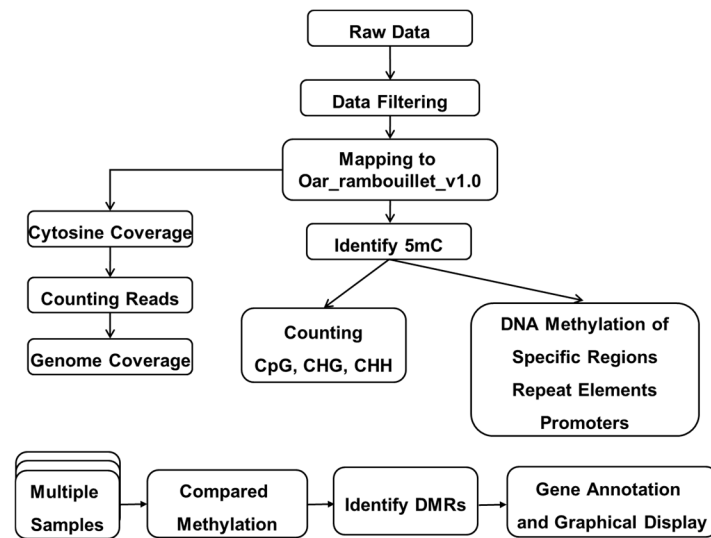

**Figure S1.** The flow chart showed the data analysis of Whole-Genome Bisulfite Sequencing.

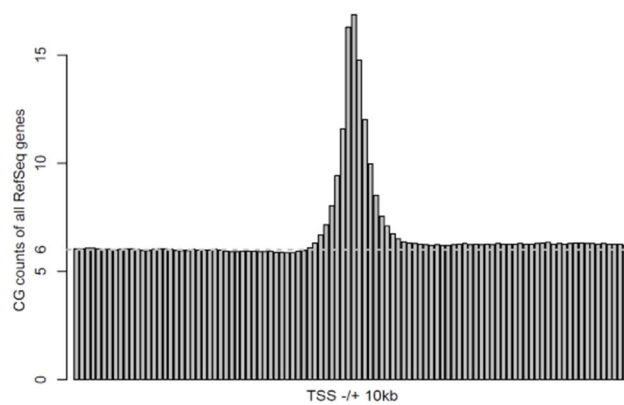

**Figure S2.** The distribution of CpG counts of the 100 bins ( $TSS \pm 10kb$ ) for all the RefSeq genes.
