# Supplementary material for: Genome-Wide DNA Methylation Patterns of Muscle and Tail-Fat in DairyMeade Sheep and Mongolian Sheep
Source: Animals (Basel). 2022 May 29;12(11):1399. doi: 10.3390/ani12111399 (PMC9179529; doi:10.3390/ani12111399)
Supplement: Supplementary file 1 [file animals-12-01399-s001.zip › animals-1685280-supplementary/animals-1685280 suplementary Tables.xlsx]

## Sheet: Table S1
Supplementary Table S1 Informations of sampling and sequencing of whole-genome DNA methylation.
Sample ID	Breeds	Sampling	Age (Month)	Total reads	Depth (X)
DMTF01	DairyMeade	Tail Fat	12	787547542	39.5795X
DMTF02	DairyMeade	Tail Fat	12	309876928	15.5952X
DMTF03	DairyMeade	Tail Fat	12	274003582	13.7341X
MGTF01	Ujimqin	Tail Fat	12	308364746	15.5293X
MGTF02	Ujimqin	Tail Fat	12	313832230	15.8011X
MGTF03	Ujimqin	Tail Fat	12	411345334	20.5985X
F1TF01	Hybrid	Tail Fat	12	404740778	20.2689X
F1TF02	Hybrid	Tail Fat	12	449573322	22.5198X
F1TF03	Hybrid	Tail Fat	12	405517362	20.321X
STH12TF01	SmallFat Tail	Tail Fat	12	809976406	40.678X
DM12M01	DairyMeade	Biceps Femoris Muscle	12	422466162	21.1167X
DM12M02	DairyMeade	Biceps Femoris Muscle	12	378451356	18.956X
DM12M03	DairyMeade	Biceps Femoris Muscle	12	452902088	22.6863X
DM3M01	DairyMeade	Biceps Femoris Muscle	3	456103116	22.8535X
DM3M02	DairyMeade	Biceps Femoris Muscle	3	299897382	15.0252X
DM3M03	DairyMeade	Biceps Femoris Muscle	3	447608506	22.4586X
F112M01	Hybrid	Biceps Femoris Muscle	12	351301996	17.5874X
F112M02	Hybrid	Biceps Femoris Muscle	12	350169568	17.5548X
F112M03	Hybrid	Biceps Femoris Muscle	12	378639472	18.965X
MG12M01	Ujimqin	Biceps Femoris Muscle	12	362125500	18.11X
MG12M02	Ujimqin	Biceps Femoris Muscle	12	427134560	21.3556X
MG12M03	Ujimqin	Biceps Femoris Muscle	12	316999834	15.944X

## Sheet: Table S2
Supplementary Table S2 Informations of DMR and gene annotations
DMRs and gene annotations of sheep fat tail between three groups.
Chrom	Start	End	DMTF	MGTF	Genename
1	3016200	3016800	0.78	0.94
1	128502900	128503500	0.0825	0.276667
1	128504400	128505000	0.819167	0.633333
1	128504700	128505300	0.95	0.19
1	128505000	128505600	0.532	0.25
1	128505300	128505900	0.656111	0.34
1	128505600	128506200	0.655208	0.46
1	128505900	128506500	0.576	0.388
1	128508600	128509200	0.425	0.116
1	128509800	128510400	0.718333	0.5525
2	40965600	40966200	0.6875	0.96	ADRA1A
2	40965900	40966500	0.666667	0.97	ADRA1A
6	15111900	15112500	0.39	0.693333	CAMK2D
10	12600	13200	0.693333	0.54
12	10200	10800	0.681666	0.4275
14	34624200	34624800	0.666667	0.366667
14	34624500	34625100	0.666667	0.366667
15	3600	4200	0.63	0.7825
15	9900	10500	0.5	0.665
15	33300	33900	0.840357	0.6625
15	33900	34500	0.837857	0.6675
15	36300	36900	0.916667	0.764667
15	36900	37500	0.89	0.606
15	81086400	81087000	0.7725	1	TSPAN18
16	33312900	33313500	0.566666	0.4
16	33313200	33313800	0.566666	0.4
17	403200	403800	0.666667	0.443333
25	15000	15600	0.554	0.875	LOC114110783
25	15300	15900	0.634286	0.83375	LOC114110783|LOC114110882
25	1527900	1528500	0.583333	0.787833	LOC114110875
X	62058300	62058900	0	0.195
X	62058600	62059200	0	0.195
X	62061300	62061900	0.326667	0.170385
X	62061600	62062200	0.267273	0.114524
Chrom	Start	End	MGTF	EHF1TF	Genename
1	128505900	128506500	0.388	0.54
1	128506500	128507100	0.496481	0.290833
1	128509500	128510100	0.653334	0.425
4	123213300	123213900	0.9075	0.5875	LOC101123290
6	15114600	15115200	0.816666	1	CAMK2D
10	1340700	1341300	0.7525	0.98
13	38350500	38351100	0.126	0.333333
15	34500	35100	0.705455	0.89
15	36600	37200	0.76525	0.223333
16	33393000	33393600	0.4475	0.27
Chrom	Start	End	DMTF	EHF1TF	Genename
1	128501100	128501700	0.332	0.6
1	128502600	128503200	0.166	0.556667
1	128505600	128506200	0.655208	0.476666
1	128506800	128507400	0.352	0.1825
1	128509500	128510100	0.695	0.425
1	128509800	128510400	0.718333	0.41625
1	128510100	128510700	0.73	0.5
6	15114600	15115200	0.853	1	CAMK2D
7	92542500	92543100	0.7	0.866667	LOC114115651
10	1340700	1341300	0.763333	0.98
10	1341000	1341600	0.751944	0.928333
13	38350500	38351100	0	0.333333
15	33300	33900	0.840357	0.67
15	36600	37200	0.811666	0.223333
15	81086100	81086700	0.7725	0.933333	TSPAN18
15	81086400	81087000	0.7725	0.933333	TSPAN18
17	58559100	58559700	0.620222	0.933333
17	58559400	58560000	0.724167	0.95
X	62061300	62061900	0.326667	0.0275
X	62061600	62062200	0.267273	0.025385
DMRs and gene annotations of sheep biceps femoris muscle between four groups.
Chrom	Start	End	DM12MLM	MG12MLM	Genename
1	128503800	128504400	0.666667	0.316667
1	128505600	128506200	0.586666	0.276667
4	123212400	123213000	0.792084	0.599279	LOC101123290
6	15114600	15115200	0.895	0.49	CAMK2D
6	32879400	32880000	0	0.333333	LOC114115287
6	32880600	32881200	0.257142	0	LOC114115287
6	32880900	32881500	0.151282	0	LOC114115287
15	32700	33300	0.765905	0.619429
15	33900	34500	0.556667	0.865
15	36000	36600	0.375	0.8
15	36600	37200	0.666667	0.81625
15	81086100	81086700	0.8275	0.62	TSPAN18
Chrom	Start	End	DM12MLM	DM3MLM	Genename
1	3016200	3016800	0.443333	0.855333
1	128504400	128505000	0.625	0.819722
1	128505600	128506200	0.586666	0.35
1	128506200	128506800	0.624583	0.41025
4	123212100	123212700	0.784444	1	LOC101123290
4	123212700	123213300	0.521111	0.666667	LOC101123290
6	32880600	32881200	0.257142	0.07375	LOC114115287
10	3000	3600	0.694048	0.511528
10	3600	4200	0.762	0.475714
12	10200	10800	0.89	0.666667
15	36000	36600	0.375	0.666667
15	36300	36900	0.6	0.928571
17	58559400	58560000	0.625	0.37
25	4431300	4431900	0.4	0.6675	DISC1|LOC114110797
Chrom	Start	End	DM12MLM	EHF112MLM	Genename
1	3016200	3016800	0.443333	0.6925
1	128504100	128504700	0.6875	0.4575
1	128506200	128506800	0.624583	0.083333
1	128509200	128509800	0.492084	0.75
6	32879400	32880000	0	0.220416	LOC114115287
6	32880600	32881200	0.257142	0.025714	LOC114115287
10	3300	3900	0.710278	0.9175
15	36300	36900	0.6	0.9175
15	36600	37200	0.666667	0.5
16	33312900	33313500	0.3525	0.668667
16	33313200	33313800	0.47	0.668667
16	33393300	33393900	0.333333	0.083333
Chrom	Start	End	MG12MLM	EHF112MLM	Genename
1	128506200	128506800	0.566	0.083333
1	128509200	128509800	0.36	0.75
3	132342300	132342900	0.9025	0.755	LOC106990344
6	32878500	32879100	0	0.25	LOC114115287
6	32878800	32879400	0	0.2	LOC114115287
10	3300	3900	0.611333	0.9175
10	3600	4200	0.65	0.89
15	27900	28500	0.626201	0.772354
15	30300	30900	0.723823	0.874
15	32700	33300	0.619429	0.789778
15	36300	36900	0.638333	0.9175
15	36600	37200	0.81625	0.5
15	81086100	81086700	0.62	0.793333	TSPAN18
X	62061300	62061900	0.259918	0.083077
X	62068800	62069400	0	0.254
